# Supplementary material for: Revisiting Date and Party Hubs: Novel Approaches to Role Assignment in Protein Interaction Networks
Source: PubMed Central journal article supplement (PMC2887459; doi:10.1371/journal.pcbi.1000817), 2010-06-17
Supplement: pcbi.1000817.s002.pdf [file pcbi.1000817.s002.pdf]

## Supplementary Figure S2

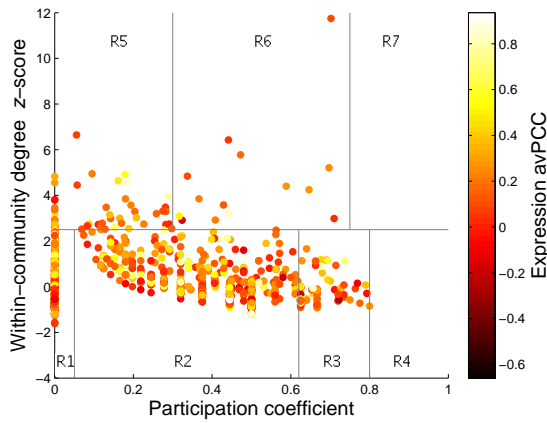

(a) FHC ( $\gamma = 0.5$ , 35 communities)

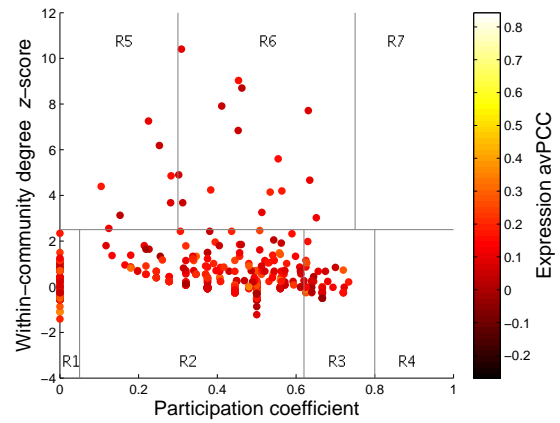

(b) CCSB-HI1 ( $\gamma = 0.5$ , 32 communities)

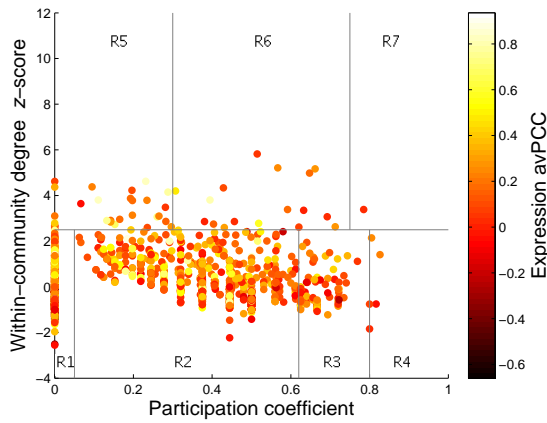

(c) FHC ( $\gamma = 2$ , 81 communities)

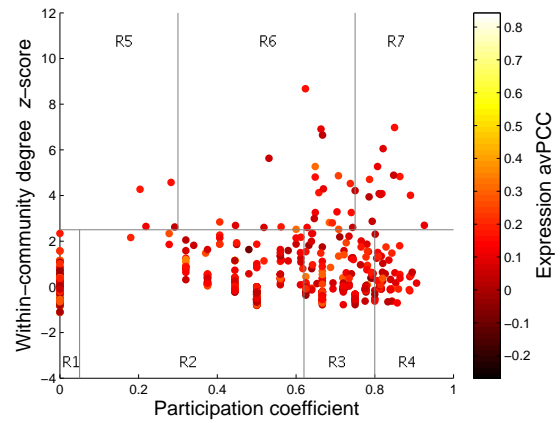

(d) CCSB-HI1 ( $\gamma = 2$ , 71 communities)

Figure S2: **Topological node role assignments and relation with avPCC.** Plots for (a),(c) Yeast network (FHC [1]—2,233 nodes) and (b),(d) Human network (CCSB-HI1 [2]—1,307 nodes). As in Figure 3, but with different resolution parameter ( $\gamma$ ) settings used for community detection (see Text S1).

## References

- [1] Bertin N, Simonis N, Dupuy D, Cusick ME, Han JDJ, et al. (2007) Confirmation of organized modularity in the yeast interactome. *PLoS Biology* 5: e153.
- [2] Rual JF, Venkatesan K, Hao T, Hirozane-Kishikawa T, Dricot A, et al. (2005) Towards a proteome-scale map of the human proteinprotein interaction network. *Nature* 437: 1173–78.
