# Supplementary material for: Revisiting Date and Party Hubs: Novel Approaches to Role Assignment in Protein Interaction Networks
Source: PubMed Central journal article supplement (PMC2887459; doi:10.1371/journal.pcbi.1000817), 2010-06-17
Supplement: pcbi.1000817.s004.pdf [file pcbi.1000817.s004.pdf]

## Supplementary Figure S4

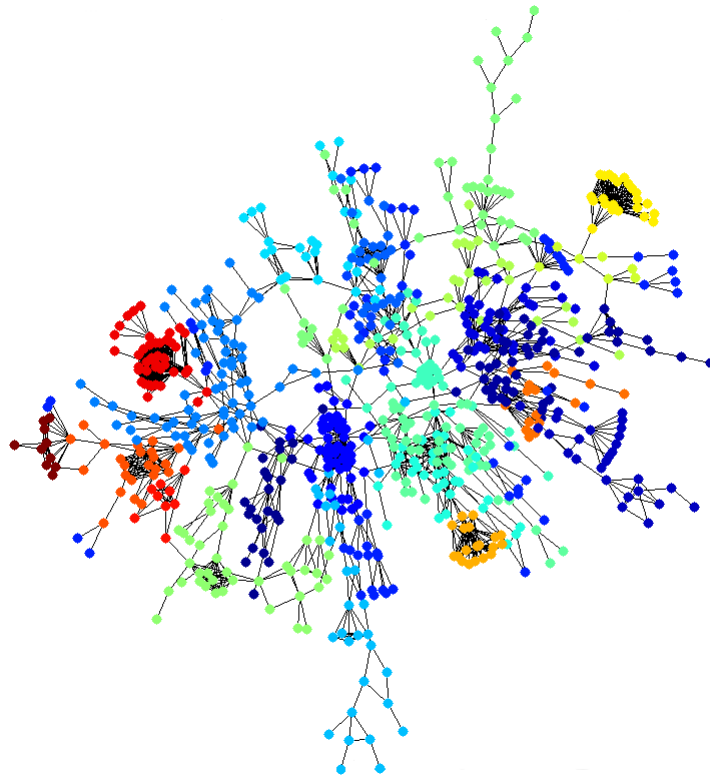

Figure S4: **Community structure in the largest connected component of the FYI network [1]**. The different colours correspond to different communities (25 in all). The graph modularity value for this partition is 0.8784. We generated this visualisation using the Kamada-Kawai algorithm [2].

## References

- [1] Han JDJ, Bertin N, Hao T, Goldberg DS, Berriz GF, et al. (2004) Evidence for dynamically organized modularity in the yeast protein-protein interaction network. *Nature* 430: 88–93.
- [2] Kamada T, Kawai S (1989) An algorithm for drawing general undirected graphs. *Information Processing Letters* 31: 7–15.
