# Supplementary material for: Revisiting Date and Party Hubs: Novel Approaches to Role Assignment in Protein Interaction Networks
Source: PubMed Central journal article supplement (PMC2887459; doi:10.1371/journal.pcbi.1000817), 2010-06-17
Supplement: pcbi.1000817.s005.pdf [file pcbi.1000817.s005.pdf]

## Supplementary Table S1

| Data set | Communities | MF <i>IC</i> |       |       | CC <i>IC</i> |       |       | BP <i>IC</i> |       |       | Best <i>IC</i> |       |       |
|----------|-------------|--------------|-------|-------|--------------|-------|-------|--------------|-------|-------|----------------|-------|-------|
|          |             | Min          | Max   | Avg   | Min          | Max   | Avg   | Min          | Max   | Avg   | Min            | Max   | Avg   |
| FYI      | 25          | 2.05         | 43.09 | 14.36 | 4.28         | 51.60 | 17.18 | 2.99         | 35.74 | 15.72 | 4.81           | 51.60 | 20.15 |
| FYI      | 25 (random) | 1.28         | 2.78  | 1.88  | 1.25         | 3.00  | 2.07  | 1.46         | 3.04  | 2.13  | 1.46           | 3.04  | 2.36  |
| FHC      | 63          | 1.47         | 51.37 | 11.22 | 0.11         | 68.18 | 16.40 | 1.73         | 98.51 | 17.08 | 1.97           | 98.51 | 20.08 |

Table S1: **Evaluating community partitions.** Information Content (*IC*) of the most enriched term for each of the three GO ontologies (MF – Molecular Function; CC – Cellular Component; BP – Biological Process) and over all three ontologies combined (‘Best *IC*’). We give the minimum, maximum, and average *IC* over all of the communities (at the default resolution  $\gamma = 1$ ) that we detected in two data sets, FYI [1] and FHC [2]. We generated the random communities for FYI using the same-size distribution to the actual ones. In other words, we remove the actual community labels of all proteins and then randomly re-assign them (using one label per protein).

## References

- [1] Han JDJ, Bertin N, Hao T, Goldberg DS, Berriz GF, et al. (2004) Evidence for dynamically organized modularity in the yeast protein-protein interaction network. *Nature* 430: 88–93.
- [2] Bertin N, Simonis N, Dupuy D, Cusick ME, Han JDJ, et al. (2007) Confirmation of organized modularity in the yeast interactome. *PLoS Biology* 5: e153.
